# Supplementary material for: Mesenchymal cell interaction with ovarian cancer cells induces a background dependent pro-metastatic transcriptomic profile
Source: J Transl Med. 2014 Mar 5;12:59. doi: 10.1186/1479-5876-12-59 (PMC4132214; doi:10.1186/1479-5876-12-59)
Supplement: Additional file 2 — Transcriptomic modification of SKOV3 and OVCAR3 after co-culture with MSCs. [file 1479-5876-12-59-S2.xlsx]

## Sheet: ovcar genes
Gene Name	Cell Line Fold Change	TCGA mean of 493 patients	std of TCGA means
AARS	4.009	7.67059	0.655772
ADI1	-2.32	8.5228	0.769449
ALDH6A1	2.371	7.34578	0.7694
ANK2	2.283	3.89467	0.697042
ANKRA2	4.843	5.96171	0.595465
APBB2	2.269	4.20978	0.568394
ARG2	4.066	4.17429	0.7117
ARID4A	2.722	4.71692	0.383692
ASNS	23.756	7.62663	0.911284
ATF2	2.657	5.41462	0.404754
ATF3	12.425	7.10773	1.45229
ATXN7	2.009	3.90922	0.438449
BAZ2B	2.149	6.28082	0.754811
BCL2L13	2.058	5.61924	0.637011
BCL6	5.544	6.61695	0.696506
BDNF	4.051	3.70378	0.53505
BEX4	4.662	7.7545	0.91369
BIRC3	2.109	5.07275	1.14425
BLVRB	2.056	6.85216	0.833602
BTG1	3.388	8.51788	0.610936
C6orf48	2.501	9.56446	0.774729
C9orf3	-2.511	7.1684	1.04069
CALCOCO2	2.487	7.14366	0.68238
CARS	4.251	7.47975	0.57824
CAV2	2.689	5.38853	0.812259
CBX4	2.134	3.68562	0.221801
CCL5	3.1505	5.25666	1.25684
CCND2	5.423	4.70932	1.10841
CCNE2	-3.954	3.87728	0.61513
CCPG1	2.033	4.65297	0.527382
CCT6A	-2.133	8.36407	0.464313
CD55	3.957	7.85537	1.0818
CDC25C	2.397	3.8879	0.282333
CDC37L1	2.106	5.02107	0.712191
CDH1	2.828	6.40773	0.508326
CDKN1C	3.902	4.94713	0.585708
CDS1	2.407	4.5815	0.356026
CEBPB	5.386	9.52912	0.562188
CEBPG	3.8915	6.24993	0.891104
CHAC1	7.375	4.79346	0.560889
CHD2	3.191	3.25951	0.149006
CHIC2	2.893	6.60273	0.71449
CLCN3	2.001	5.79087	0.658932
CLGN	3.36	5.87283	1.68304
CLIC4	2.5645	6.41515	0.653059
CLIP4	2.157	4.09048	0.32398
COG5	2.008	6.66904	0.651387
COL11A1	-2.4305	6.03635	2.41164
COL1A1	-7.335	7.32049	1.30401
COL1A2	-26.1505	10.7381	1.16549
COL3A1	-6.646	9.98306	1.46394
COL6A3	-9.575	9.17076	1.47404
CSTF3	-2.038	6.80457	0.528004
CTBS	2.171	5.64484	0.6464
CTH	12.9115	3.86719	0.410168
DDIT3	9.775	5.8678	0.728303
DDIT4	6.046	7.02144	1.1688
DDX58	2.918	5.99475	1.19515
DHFR	-2.103	5.89466	0.745353
DIAPH2	2.591	4.53725	0.378252
DKK3	2.3185	4.17564	0.687521
DNAJA1	-3.228	9.81824	0.666743
DNAJB14	2.213	5.6908	0.586384
DNAJB9	4.0845	6.16918	0.74945
DNAJC6	2.695	3.64238	0.346605
DNM3	-2.056	4.17638	0.597141
DNMT3B	2.766	5.10099	0.671033
DTL	-2.366	5.91586	0.857606
DUSP5	3.039	4.71421	1.02787
EIF4EBP1	2.716	6.84059	0.823991
ETNK1	2.603	5.77056	0.84018
FAM129A	3.049	5.32499	1.26819
FAM131A	3.077	5.87126	0.611191
FBXO42	2.177	5.0247	0.411952
FEN1	-2.645	6.27462	0.678803
FGD6	2.2745	3.7149	0.415553
FN1	-7.75233	8.13057	1.08524
FRMD4A	-2.223	3.536	0.473437
FRY	2.504	3.97154	0.394771
FYN	4.399	6.29461	1.07081
FZD7	2.748	5.91753	1.05142
GADD45A	8.742	7.99537	0.838066
GARS	3.507	8.65025	0.611265
GATAD1	2.28	6.54824	0.561816
GDF15	27.92	3.94453	0.407732
GEM	3.284	4.87231	1.04173
GEMIN6	-2.009	6.72935	0.56747
GFPT1	2.6665	6.67904	0.64805
GGPS1	2.21	6.74453	0.61578
GINS2	-2.887	6.09693	0.899081
GLRX2	2.085	7.03232	0.63111
GMNN	-2.039	7.51703	0.950624
GNAI1	2.051	5.20058	0.911636
GOLPH3L	2.014	8.05985	0.586432
GOT1	5.261	7.26234	0.71382
GPR126	2.692	4.31956	0.940879
GPR56	2.348	6.11489	0.721093
GRB10	3.308	5.46814	0.616751
GREM1	-8.078	3.65815	1.15092
GTF2H1	2.015	6.33114	0.581987
GULP1	2.001	5.15251	1.02813
H1F0	4.5	7.42896	0.863184
HBP1	3.018	5.64465	0.284036
HECA	3.355	6.95693	0.717937
HERC5	2.286	6.89727	1.39357
HERPUD1	4.879	8.51482	0.692775
HIP1	2.159	4.68397	0.579746
HKDC1	3.959	3.63609	0.361821
HLF	2.2895	3.34214	0.194235
HNF4G	2.831	3.27421	0.119798
HNRPDL	-2.088	8.24058	0.429135
HOXA1	3.169	3.66948	0.641845
HSP90AA1	-2.05	11.0898	0.378152
HSPA8	-6.5825	10.4577	0.799462
HSPE1	-2.153	9.46117	0.554124
IER3	2.229	7.97983	1.23809
IFI27	3.264	10.4916	1.43466
IFI44L	2.911	7.09689	1.56416
IFI6	2.659	9.31044	1.42203
IFIT2	2.285	5.5741	1.05582
IFITM1	2.405	10.6587	1.05437
IFRD1	2.106	6.56062	0.754915
IL18	2.506	4.47451	0.86442
IMP3	-2.095	8.01584	0.711167
INHBA	-5.4555	4.30734	0.857002
INHBE	38.306	3.5555	0.470133
IRS2	4.118	7.242	1.04918
ISG15	2.004	9.1815	1.42466
ISG20	2.796	5.86276	1.1155
JHDM1D	3.807	4.79724	0.590648
JMJD1C	3.2565	6.77032	0.68763
KIAA0430	2.152	6.32531	0.602091
KIF21B	4.077	4.01772	0.282219
KLF3	2.03	4.92845	0.423962
KLF4	3.361	4.49069	0.754069
KLF9	7.605	4.55727	0.526908
KLHL24	6.337	6.81306	0.732803
KRCC1	2.5475	8.18672	0.801141
LARP6	5.563	5.65981	0.819098
LEPR	3.498	3.6953	0.449838
LPIN1	2.287	5.4579	0.603778
LRRC49	2.384	4.82278	0.796434
LUC7L	-2.054	5.82996	0.569817
LYST	4.207	4.11599	0.371298
MAP1LC3B	3.567	7.1177	0.646686
MAP3K8	2.121	4.8016	0.778132
MAP4K3	2.212	6.41438	0.665221
MARS	2.96	7.98376	0.539447
MAT2A	-3.29	6.39614	0.354937
MBNL2	3.965	4.93149	0.414924
MCM10	-2.4925	4.45248	0.900441
MCM3	-2.041	7.16907	0.781213
MCM4	-2.3235	5.55535	0.716513
MCM5	-2.5625	5.67601	0.64201
MCM6	-2.243	8.26677	0.747139
MCM7	-2.391	7.12032	0.748547
MED13L	2.17	5.7181	0.574035
MEF2A	2.413	5.51099	0.485042
MGEA5	2.3225	6.73892	0.518174
MID1IP1	2.031	6.34004	0.726579
MKLN1	2.538	5.55036	0.557595
MMD	2.009	7.01253	1.12749
MOCOS	2.686	5.0852	1.01512
MOSPD1	2.536	6.54601	0.861565
MOSPD2	2.919	5.31909	0.503268
MTHFD2	3.096	8.14223	0.64125
MTO1	2.0425	6.05789	0.657765
MXD1	3.823	2.98065	0.134173
MXI1	3.878	8.41138	0.683472
NASP	-2.052	6.2693	0.67341
NBR1	2.309	6.74676	0.569427
NETO2	-2.022	4.92214	1.08466
NFE2L1	2.895	7.09529	0.55128
NFIL3	4.504	7.4871	0.859449
NID1	2.609	4.54984	0.782565
NR2C2	2.008	4.14529	0.328193
NR3C1	3.093	6.66776	0.788769
NT5DC2	-2.039	6.39224	0.864221
OAS1	2.136	6.37448	1.36809
OAS2	2.374	5.38262	1.06442
OCLN	2.791	5.03991	0.639022
OGT	2.263	6.52432	0.732296
OPTN	2.012	7.2361	0.813454
PACSIN2	2.056	6.76383	0.588945
PCK2	9.35	6.38367	0.721577
PCNA	-2.552	8.54748	0.70608
PDCD4	3.63933	5.99873	0.587713
PELI1	2.776	6.66862	0.732645
PHACTR2	2.67	5.47956	0.769982
PHGDH	3.841	7.10644	0.98538
PHLDA1	4.4585	4.42323	0.714941
PLCB1	3.321	4.77114	0.473392
PMAIP1	3.747	5.26977	0.981844
PNRC1	3.572	7.20212	0.464952
POSTN	-7.966	6.97258	2.71489
PPM1A	2.293	5.75977	0.393186
PPP1R15A	3.107	4.76552	0.553262
PPP3CA	2.065	6.98181	0.717777
PRKACB	2.085	5.88004	0.772486
PSAT1	3.034	6.79469	1.26054
PTCH1	2.405	3.87156	0.275057
R3HDM2	2.55	7.03066	0.622472
RAB6B	2.739	4.96332	0.758388
RASGRP1	2.172	4.91733	1.00925
RB1CC1	2.562	7.12112	0.566552
RBM12	-2.446	6.46222	0.42065
RBM14	-2.483	5.76947	0.380348
RBM3	-2.007	7.52594	0.973969
RBM8A	-2.509	7.11856	0.66988
RHOB	-2.243	6.9295	0.970777
RHOF	2.133	6.03073	0.918864
RIT1	2.1415	5.30225	0.857734
RNASE4	2.501	4.74953	0.902829
RPS6KA2	5.107	5.30083	0.700326
RRM2	-3.126	7.98621	1.0931
RRS1	-2.142	6.98472	0.546969
RSAD2	4.3405	6.03237	1.46789
RUNDC3B	4.6435	3.31425	0.417886
SARS	3.567	8.49698	0.570934
SAT1	2.775	9.1253	0.833573
SCN7A	2.885	2.98031	0.118599
SENP6	2.133	5.87542	0.580643
SEPP1	4.439	10.5572	0.757179
SFPQ	-2.418	7.5888	0.345665
SHMT2	2.287	7.0796	0.710949
SKP2	-2.252	5.18067	0.49624
SLC1A5	2.338	5.68024	0.619418
SLC22A18	2.637	6.40491	0.892551
SLC33A1	2.703	6.06307	0.571164
SLC38A2	2.136	10.0171	0.596784
SLC3A2	2.109	5.83082	0.567539
SLC7A11	14.75	4.70246	0.723739
SNTB1	3.779	4.36282	0.598789
SNX16	3.337	4.4318	0.675248
SNX24	2.106	4.99252	0.632407
SOS2	2.033	4.32663	0.257273
SP100	2.067	5.46627	0.475496
SPARC	-7.397	9.13035	1.13267
SSPN	2.955	7.17954	1.03127
STK17B	2.079	4.3297	0.704378
SYNCRIP	-2.2045	7.97997	0.579779
TANK	3.057	6.4714	0.660259
TAOK3	2.352	4.95484	0.463093
TARS	2.061	8.23189	0.560063
TBC1D9	2.792	5.48748	0.502787
TCEA1	2.227	9.5342	0.488553
TES	2.282	7.89261	0.713471
TFEB	2.262	4.48515	0.482631
TIPIN	-2.181	5.44669	0.673316
TK1	-2.16	5.70409	0.774043
TMEM135	2.409	6.37264	0.785046
TMEM41B	2.458	6.75242	0.592551
TNFRSF10B	2.583	4.73952	0.402308
TNFSF9	3.053	3.75857	0.235681
TNKS	2.012	4.44293	0.302934
TOX3	4.523	3.58394	1.09251
TRIB3	14.92	5.58931	0.922351
TRIM2	3.007	5.382	0.698117
TRIM29	-2.415	4.92614	0.820554
TRIM36	2.839	3.6136	0.672285
TSC22D3	9.287	6.23959	0.756607
TTBK2	2.486	3.91368	0.365393
TTC33	2.322	5.00348	0.616461
TUBA4A	-2.136	6.87322	1.04832
TUBB2B	2.863	4.05423	1.77305
TWIST1	2.854	4.93865	1.31638
TXNIP	8.643	9.15989	0.936945
TXNRD1	2.234	8.0359	0.572861
UBR5	3.66	7.06201	0.671332
ULBP2	2.251	3.10704	0.205737
UPP1	4.143	4.42324	0.824596
USP1	2.087	8.84981	0.599054
USP25	2.282	7.26203	0.819736
VAMP4	2.217	4.94434	0.517485
VEGFA	2.7185	6.4949	0.774198
VLDLR	3.15	5.21831	1.02223
WAC	2.744	7.45809	0.489951
WARS	2.6515	7.10658	0.873306
WDR41	2.259	6.34768	0.762025
WHSC1L1	2.292	3.79727	0.318104
WIPI1	3.945	5.21677	0.88151
XBP1	2.612	8.37615	0.910875
YARS	2.803	7.92225	0.581972
YPEL5	3.757	9.02496	0.599323
ZC3H7A	2.348	5.83175	0.556103
ZCCHC8	2.286	6.90639	0.579108
ZEB1	2.007	3.67935	0.461913
ZFAND1	2.12	6.95658	0.75913
ZMYM2	2.034	5.6113	0.533671
ZMYM5	3.213	3.79091	0.297582
ZNF148	2.053	7.52787	0.509787
ZNF222	2.277	4.04936	0.444125
ZNF451	2.658	5.13298	0.483502

## Sheet: skov genes
Gene Name	Cell Line Fold Change	TCGA mean of 493 patients	std of TCGA means
AACS	-2.824	6.62507	0.597349
ABCD3	2.329	7.62104	0.575815
ABLIM1	-2.077	7.52162	0.905894
ACAT2	-2.756	5.57921	0.732073
ACSL1	-2.122	5.7477	0.959049
ACTA2	2.069	8.98393	1.38828
ADAMTS5	-2.374	4.60358	1.07263
ALDH3A1	-2.015	4.26063	0.318156
ALDH6A1	-2.264	7.34578	0.7694
ALDOC	-5.613	5.42113	0.861768
ANXA9	-2.283	3.83663	0.6481
APOC1	-2.314	7.80809	1.2447
ARHGAP24	-2.043	3.41691	0.20162
ARID5B	-2.172	8.79599	0.765603
B3GALT5	-2.007	2.88561	0.131826
BTG2	-2.405	5.85238	0.698439
C14orf1	-2.9955	5.64692	0.429029
CA12	-2.176	5.03606	1.12672
CBS	-2.5325	6.28281	1.10474
CCL2	8.275	6.35675	1.35436
CDH1	-4.22	6.40773	0.508326
CDH11	7.012	6.66502	1.50742
CFI	-2.414	8.00333	1.11922
CITED2	-2.115	5.66071	0.873264
CLDN10	2.058	6.78846	2.00454
CLDN11	6.752	3.54708	0.199147
CLIC3	-7.46	4.50477	1.29384
COL1A1	15.7217	7.32049	1.30401
COL1A2	26.6807	10.7381	1.16549
COL3A1	17.644	9.98306	1.46394
COL5A2	2.467	7.07819	1.81491
COL6A3	10.121	9.17076	1.47404
COL8A1	2.922	2.98175	0.129228
CTH	-2.091	3.86719	0.410168
CXCL6	15.511	3.7507	0.96784
CXCR4	2.912	7.81731	1.13973
CYBRD1	-2.069	5.62325	1.20533
CYP51A1	-2.029	6.2681	0.744303
DCN	2.446	8.2188	1.60835
DDIT4	-2.596	7.02144	1.1688
DHCR7	-3.118	5.74441	0.642087
DHRS3	-2.131	7.69572	1.14614
DKK1	2.035	3.49102	0.647847
FAM117A	-2.627	6.74679	0.650934
FAP	2.07	4.58894	1.495
FASN	-2.066	4.64203	0.532072
FDFT1	-2.283	8.84985	0.81557
FGFBP1	-3.43	4.13113	0.731819
FGFR2	-2.7825	4.97095	0.458401
FN1	2.025	8.13057	1.08524
FOLR1	-2.04	9.29769	1.43656
FST	3.52	4.77724	1.013
GLDC	-2.02	6.68177	1.59992
GLIPR1	2.62667	5.04737	0.918061
GPNMB	4.536	8.43789	1.40793
GPR110	-2.019	3.52435	0.183854
GREM1	8.4795	3.65815	1.15092
GUCY1B3	-2.018	6.14761	1.24292
HLA-DMA	-2.794	7.85195	1.51969
HMGCR	-2.009	6.02047	0.722985
HMGCS1	-2.839	5.01519	0.581546
HS3ST3A1	2.043	4.5137	1.03607
HSD11B1	3.316	4.40119	0.565285
HSPA2	-2.339	6.03939	1.11735
IDI1	-2.276	6.82037	0.80452
IGFBP5	4.45	5.40555	0.76048
IL33	5.069	3.22066	0.420993
INHBA	4.343	4.30734	0.857002
INSIG1	-3.15	5.67981	0.799143
JUP	-2.28	7.86241	0.630578
KCNK15	-2.554	5.03679	0.765112
KIAA1199	9.958	5.74847	1.2061
KITLG	2.298	3.07814	0.0967515
KRT14	2.31	4.48424	1.50572
KRT5	-2.106	5.16444	1.3283
LDLR	-2.05	4.74985	0.6767
LPIN1	-3.0045	5.4579	0.603778
LSS	-2.947	4.47407	0.270682
MAL	-2.382	7.48334	2.08348
MAP1LC3C	-2.824	3.46564	0.270769
MGP	16.068	7.64801	1.39082
MMP3	5.878	4.41852	0.535047
MPPED2	-3.369	4.92389	1.09845
MPZL2	-2.561	5.51834	0.857972
MTHFR	-2.234	3.60085	0.148244
MVD	-2.198	3.47088	0.177628
NEBL	-2.339	3.91909	0.339438
NID1	2.755	4.54984	0.782565
NSDHL	-2.194	5.87532	0.68416
OSBPL11	-2.017	6.26874	0.742279
PAPPA	4.8178	3.598	0.13891
PARD6B	-2.111	2.98478	0.134156
PDGFRA	4.595	5.44631	0.850127
PDK4	2.506	3.7337	0.433144
PDZK1	-3.868	3.4584	0.725813
PI3	2.294	5.45108	1.73198
PNPLA3	-2.567	3.72296	0.368308
PPARGC1A	-2.673	3.25691	0.37
PPL	-2.725	7.49061	1.05364
PSG4	-2.135	3.42406	0.236122
PSG5	-2.86	3.67252	0.268671
RAB26	-2.415	3.67705	0.418894
RAB40B	-2.002	6.65404	0.930172
RBP1	2.881	8.68112	1.17168
RGS4	2.67	4.30243	0.669515
SCD	-3.34175	5.30593	0.648397
SCIN	-2.423	5.63645	0.509278
SDPR	-2.206	3.33356	0.334849
SEPP1	-2.384	10.5572	0.757179
SERPINE1	3.12	4.79563	1.01095
SFRP4	5.664	5.11795	1.43953
SLC29A2	-2.266	4.72793	0.586572
SLCO4C1	-2.849	3.27937	0.124817
SNCA	-2.054	4.52965	0.524522
SORBS2	-2.826	3.96651	0.518897
SPARC	5.5415	9.13035	1.13267
SPC25	2.059	4.95072	0.916777
SPON2	3.84	5.41276	0.953272
SQLE	-2.061	6.44462	0.799292
SREBF1	-2.374	5.26256	0.624335
STAR	3.871	3.87088	0.979486
STC1	-2.59167	4.55921	0.911015
STEAP1	2.135	6.22745	1.26045
SULF1	2.628	6.66841	1.70355
SUSD4	-2.184	5.73667	1.0813
SYNPO	-2.362	5.68296	0.798683
TCF4	2.235	6.6372	0.79101
TGFBI	2.058	8.78346	1.21472
THBS2	4.699	6.84494	1.89616
TM7SF2	-4.336	6.14752	0.823874
TMEM97	-2.538	7.16517	0.814713
TNC	4.544	5.46735	1.42258
TNFAIP6	2.62	4.92416	1.14954
TRIM2	-3.13667	5.382	0.698117
TROAP	2.016	5.36023	0.720454
TSC22D3	-2.777	6.23959	0.756607
TSPAN8	4.09	4.88662	1.84965
UCHL1	2.071	7.28362	1.8138
UCP2	-4.414	8.97662	0.849991
UPK3B	-2.391	5.45532	1.37018
VAV3	-2.7695	5.86173	1.77065
VCAM1	3.403	6.26768	1.6131
VSNL1	-2.063	3.92536	0.524597
